# Supplementary material
Source: MDPI journal article supplement (https://www.mdpi.com/2227-9091/9/9/159)
Supplement: s1 [file s1 › risks-1317488-supplementary.pdf]

# Empirics of Korean Shipping Companies' Default Predictions

## Supplementary Materials

Sunghwa Park, Hyunsok Kim, Janghan Kwon and Taeil Kim

**Table S1.** A Correlation Matrix for the Seven Variables

|    | X1        | X2    | X3       | X4        | X5    | X6    | X7   |
|----|-----------|-------|----------|-----------|-------|-------|------|
| X1 | 1.00      |       |          |           |       |       |      |
| X2 | −0.02     | 1.00  |          |           |       |       |      |
| X3 | 0.33 ***  | −0.04 | 1.00     |           |       |       |      |
| X4 | 0.04 *    | −0.03 | 0.01     | 1.00      |       |       |      |
| X5 | −0.19 *** | 0.05  | −0.06 ** | −0.14 *** | 1.00  |       |      |
| X6 | 0.01      | −0.05 | 0.90 *** | 0.01      | −0.03 | 1.00  |      |
| X7 | 0.02      | −0.01 | −0.01    | −0.01     | −0.01 | −0.03 | 1.00 |

Note: X1 = ratio of income to total assets; X2 = ratio of operating income to sales; X3 = ratio of interest expenses to liabilities; X4 = current ratio; X5 = debt ratio; X6 = ratio of freight income to chartering cost; and X7 = ratio of chartering cost to sales. \*  $p < 0.10$ , \*\*  $p < 0.05$ , \*\*\*  $p < 0.01$ .

**Table S2.** Wald Chi-Square Test

|    | Wald Chi-Square | P    |
|----|-----------------|------|
| X1 | 5.76 **         | 0.02 |
| X2 | 7.68 **         | 0.01 |
| X3 | 5.21 **         | 0.02 |
| X4 | 4.40 **         | 0.04 |
| X5 | 61.11 ***       | 0.00 |
| X6 | 0.00            | 0.97 |
| X7 | 7.64 **         | 0.01 |

Note: X1 = ratio of income to total assets; X2 = ratio of operating income to sales; X3 = ratio of interest expenses to liabilities; X4 = current ratio; X5 = debt ratio; X6 = ratio of freight income to chartering cost; and X7 = ratio of chartering cost to sales. \*  $p < 0.10$ , \*\*  $p < 0.05$ , \*\*\*  $p < 0.01$ .

**Table S3.** Bivariable Correlation Analysis ( $\rho = \text{corr}(A, B)$ )

| <i>A</i> | <i>B</i> | $\rho$ |
|----------|----------|--------|
| X1       | X2       | 0.33   |
|          | X3       | −0.02  |
|          | X4       | 0.04   |
|          | X5       | −0.19  |
|          | X6       | 0.02   |
|          | X7       | 0.01   |
| X2       | X3       | −0.04  |
|          | X4       | 0.01   |
|          | X5       | −0.06  |
|          | X6       | −0.01  |
|          | X7       | 0.70   |
| X3       | X4       | −0.03  |
|          | X5       | 0.05   |
|          | X6       | −0.01  |
|          | X7       | −0.05  |
| X4       | X5       | −0.14  |
|          | X6       | −0.01  |
|          | X7       | 0.01   |
| X5       | X6       | −0.01  |
|          | X7       | −0.03  |
| X6       | X7       | −0.03  |

Note: This table displays correlation coefficients( $\rho$ ) between explanatory variables. X1 = ratio of income to total assets; X2 = ratio of operating income to sales; X3 = ratio of interest expenses to liabilities; X4 = current ratio; X5 = debt ratio; X6 = ratio of freight income to chartering cost; and X7 = ratio of chartering cost to sales.
